# Supplementary material for: Metal-doped carbons from polyurea-crosslinked alginate aerogel beads
Source: Royal Society of Chemistry journal article supplement (doi:10.1039/d0ma01025a), 2021-01-01
Supplement: d0ma01025a1.pdf [file d0ma01025a1.pdf]

# Metal-doped Carbons from Polyurea-Crosslinked Alginate Aerogel Beads

Grigorios Raptopoulos,<sup>1</sup> Maria Papastergiou,<sup>1</sup> Despoina Chriti,<sup>1</sup> Eleni Effraimopoulou,<sup>1</sup> Tomaz Čendak,<sup>2</sup>  
Nikolaos Samartzis,<sup>3</sup> Gregor Mali,<sup>2</sup> Theophilos Ioannides,<sup>3</sup> Pavel Gurikov,<sup>4</sup> Irina Smirnova,<sup>5</sup> Patrina  
Paraskevopoulou\*<sup>1</sup>

<sup>1</sup> Inorganic Chemistry Laboratory, Department of Chemistry, National and Kapodistrian University of Athens, Panepistimiopolis Zografou 15771, Athens, Greece

<sup>2</sup> National Institute of Chemistry, Hajdrihova 19, 1000 Ljubljana, Slovenia

<sup>3</sup> Foundation for Research & Technology-Hellas, Institute of Chemical Engineering Sciences (FORTH/ICE-HT), 26504 Patras, Greece

<sup>4</sup> Laboratory for Development and Modelling of Novel Nanoporous Materials, Hamburg University of Technology, Eißendorfer Straße 38, 21073 Hamburg, Germany

<sup>5</sup> Institute of Thermal Separation Processes, Hamburg University of Technology, Eißendorfer Straße 38, 21073 Hamburg, Germany

## Table of contents

|                                                                                                                                                                                                                                                                              |   |
|------------------------------------------------------------------------------------------------------------------------------------------------------------------------------------------------------------------------------------------------------------------------------|---|
| <b>Figure S1.</b> Optical photographs and size distributions of native (M-alg) aerogel beads (M: Co, Ni, Cu), as indicated (diameters measured with ImageJ; histograms were calculated using OriginPro 9.0). Mean diameter and sample size (N) are shown on the Figure. .... | 3 |
| <b>Figure S2.</b> Optical photograph and size distributions of crosslinked X-M-alginate (M: Ca, Co, Ni, Cu), as indicated (diameters measured with ImageJ; histograms were calculated using OriginPro 9.0). Mean diameter and sample size (N) are shown on the Figure. ....  | 3 |
| <b>Figure S3.</b> EDX spectra of native (M-alg) and crosslinked (X-M-alg) aerogel beads (M: Co, Ni, Cu), as indicated. ....                                                                                                                                                  | 4 |
| <b>Figure S4.</b> N <sub>2</sub> -sorption diagrams of native (M-alg – left) and crosslinked (X-M-alg – right) aerogel beads (M: Co, Ni, Cu), as indicated. Insets show pore size distributions by the BJH method. ....                                                      | 5 |

|                                                                                                                                                                                                                                                                                                                                                                                   |    |
|-----------------------------------------------------------------------------------------------------------------------------------------------------------------------------------------------------------------------------------------------------------------------------------------------------------------------------------------------------------------------------------|----|
| <b>Figure S5.</b> Plot of $1/\rho_b$ vs $V_{\text{Total}}$ for native (M-alg), crosslinked (X-M-alg) and carbon (X-M-C) aerogels, as indicated.....                                                                                                                                                                                                                               | 6  |
| <b>Figure S6.</b> Size distributions of carbon (X-M-C) aerogel beads (M: Co, Ni, Cu), as indicated (diameters measured with ImageJ; histograms were calculated using OriginPro 9.0). Mean diameter and sample size (N) are shown on the Figure. ....                                                                                                                              | 6  |
| <b>Figure S7.</b> PXRD patterns of X-Co-C aerogel beads. Simulated experimental spectrum and library line spectra. The crystallite size is shown in parentheses. ....                                                                                                                                                                                                             | 7  |
| <b>Figure S8.</b> PXRD patterns of X-Ni-C aerogel beads. Simulated experimental spectrum and library line spectra. The crystallite size is shown in parentheses. ....                                                                                                                                                                                                             | 8  |
| <b>Figure S9.</b> PXRD patterns of X-Cu-C aerogel beads. Simulated experimental spectrum and library line spectra. The crystallite size is shown in parentheses. ....                                                                                                                                                                                                             | 9  |
| <b>Figure S10.</b> Thermogravimetric analysis (TGA, under O <sub>2</sub> ) of carbon (X-M-C; M: Co, Ni, Cu) aerogel beads, as indicated. ....                                                                                                                                                                                                                                     | 10 |
| <b>Figure S11.</b> Left: Position of D and G bands on the Raman spectra of carbon (X-M-C; M: Co, Ni, Cu) aerogel beads. Right: $I(D)/I(G)$ peak intensity ratio and calculated crystallite size ( $L_a$ ) of the graphitic domains. Error bars stand for standard deviation (N=10). ....                                                                                          | 10 |
| <b>Figure S12.</b> Deconvoluted Co $2p_{3/2}$ (left), Ni $2p_{3/2}$ (middle) and Cu $2p_{3/2}$ (right) XP spectra of carbon (X-M-C; M: Co, Ni, Cu) aerogel beads, as indicated. Experimental points are shown with black circles, cumulative fit plots with black solid lines and Shirley baseline with dashed black lines. Peak maxima (eV) are provided within the frames. .... | 11 |
| <b>Figure S13.</b> EDX spectra of carbon (X-M-C; M: Co, Ni, Cu) aerogel beads, as indicated. ....                                                                                                                                                                                                                                                                                 | 12 |
| <b>Figure S14.</b> N <sub>2</sub> -sorption diagrams of carbon (X-M-C; M: Co, Ni, Cu) aerogel beads, as indicated. Insets show pore size distributions by the BJH method. ....                                                                                                                                                                                                    | 13 |
| <b>Figure S15.</b> Dubinin-Radushkevich (DR) plots for carbon (X-M-C; M: Co, Ni, Cu) aerogel beads, as indicated. Specific micropore volumes were calculated from the intercepts (shown on the Figure, next to the corresponding line) of the linear-fitting plots. ....                                                                                                          | 14 |
| <b>Figure S16.</b> Representative SEM images of X-Ca-C beads as obtained (left) and after treatment with an aqueous HCl solution (right).....                                                                                                                                                                                                                                     | 14 |

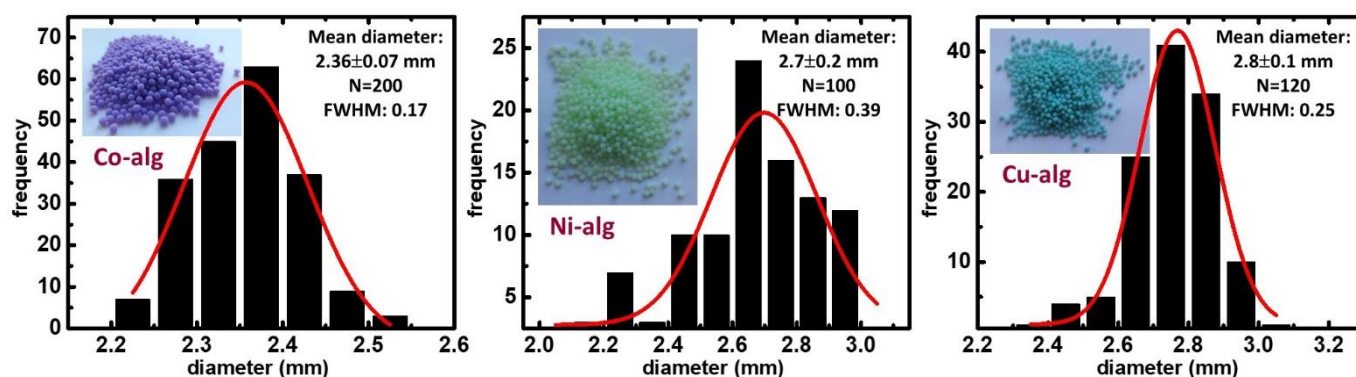

**Figure S1.** Optical photographs and size distributions of native (M-alg) aerogel beads (M: Co, Ni, Cu), as indicated (diameters measured with ImageJ; histograms were calculated using OriginPro 9.0). Mean diameter and sample size (N) are shown on the Figure.

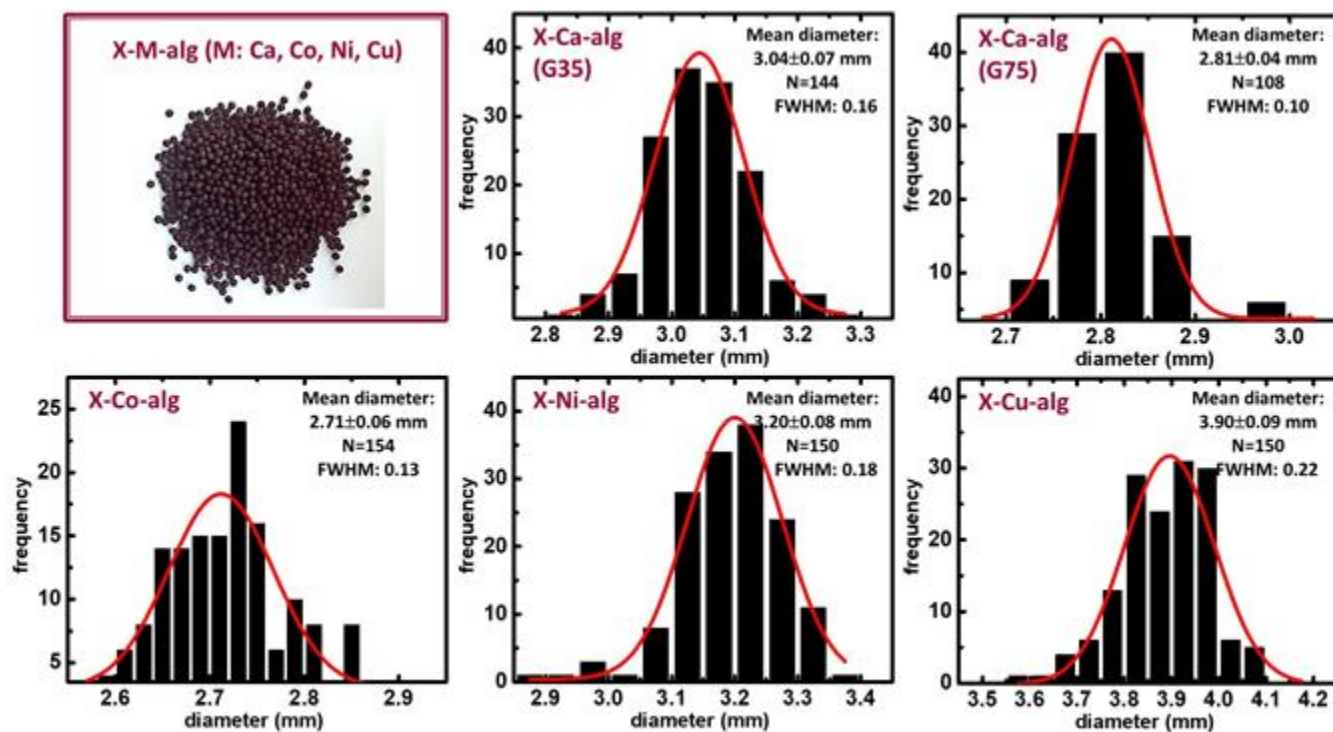

**Figure S2.** Optical photograph and size distributions of crosslinked X-M-alginate (M: Ca, Co, Ni, Cu), as indicated (diameters measured with ImageJ; histograms were calculated using OriginPro 9.0). Mean diameter and sample size (N) are shown on the Figure.

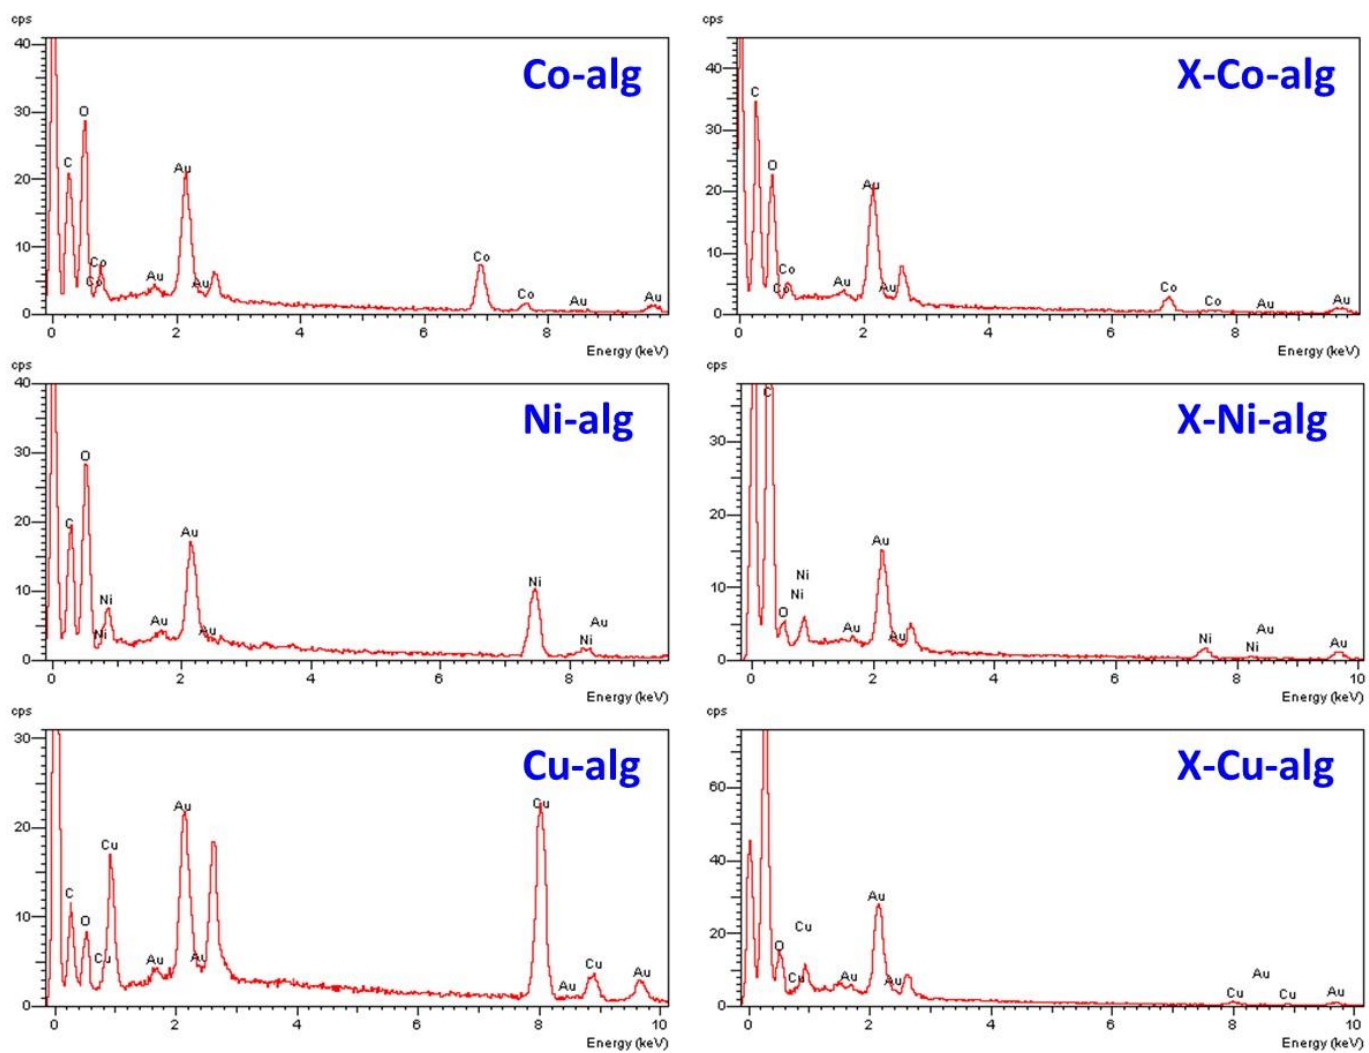

**Figure S3.** EDX spectra of native (M-alg) and crosslinked (X-M-alg) aerogel beads (M: Co, Ni, Cu), as indicated.

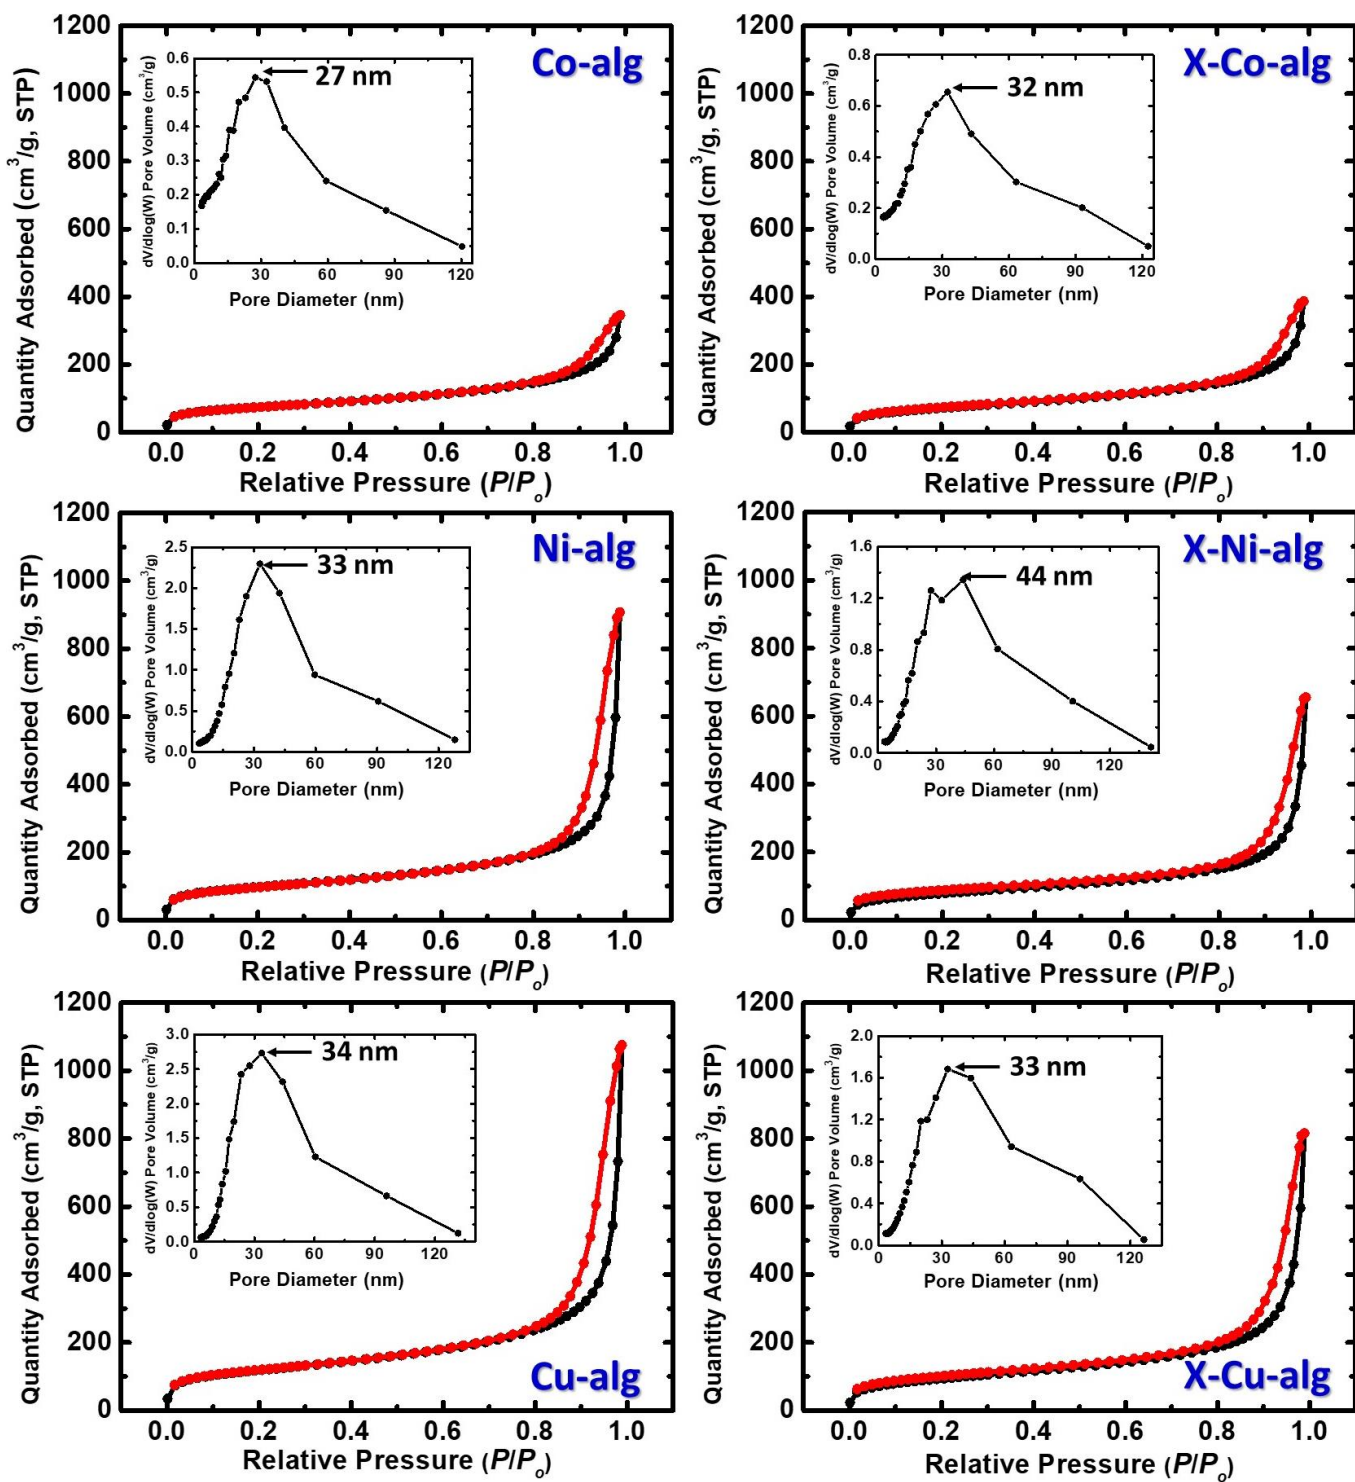

**Figure S4.** N<sub>2</sub>-sorption diagrams of native (M-alg – left) and crosslinked (X-M-alg – right) aerogel beads (M: Co, Ni, Cu), as indicated. Insets show pore size distributions by the BJH method.

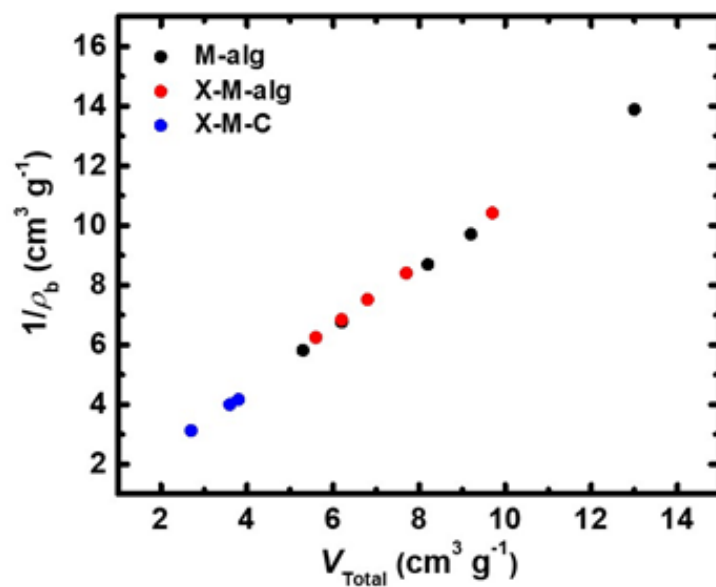

**Figure S5.** Plot of  $1/\rho_b$  vs  $V_{Total}$  for native (M-alg), crosslinked (X-M-alg) and carbon (X-M-C) aerogels, as indicated.

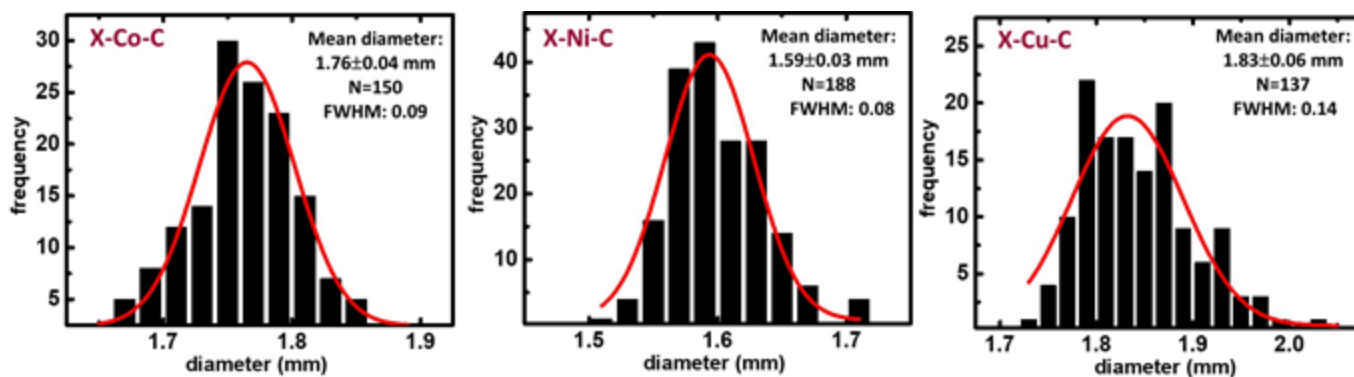

**Figure S6.** Size distributions of carbon (X-M-C) aerogel beads (M: Co, Ni, Cu), as indicated (diameters measured with ImageJ; histograms were calculated using OriginPro 9.0). Mean diameter and sample size (N) are shown on the Figure.

# X-Co-C

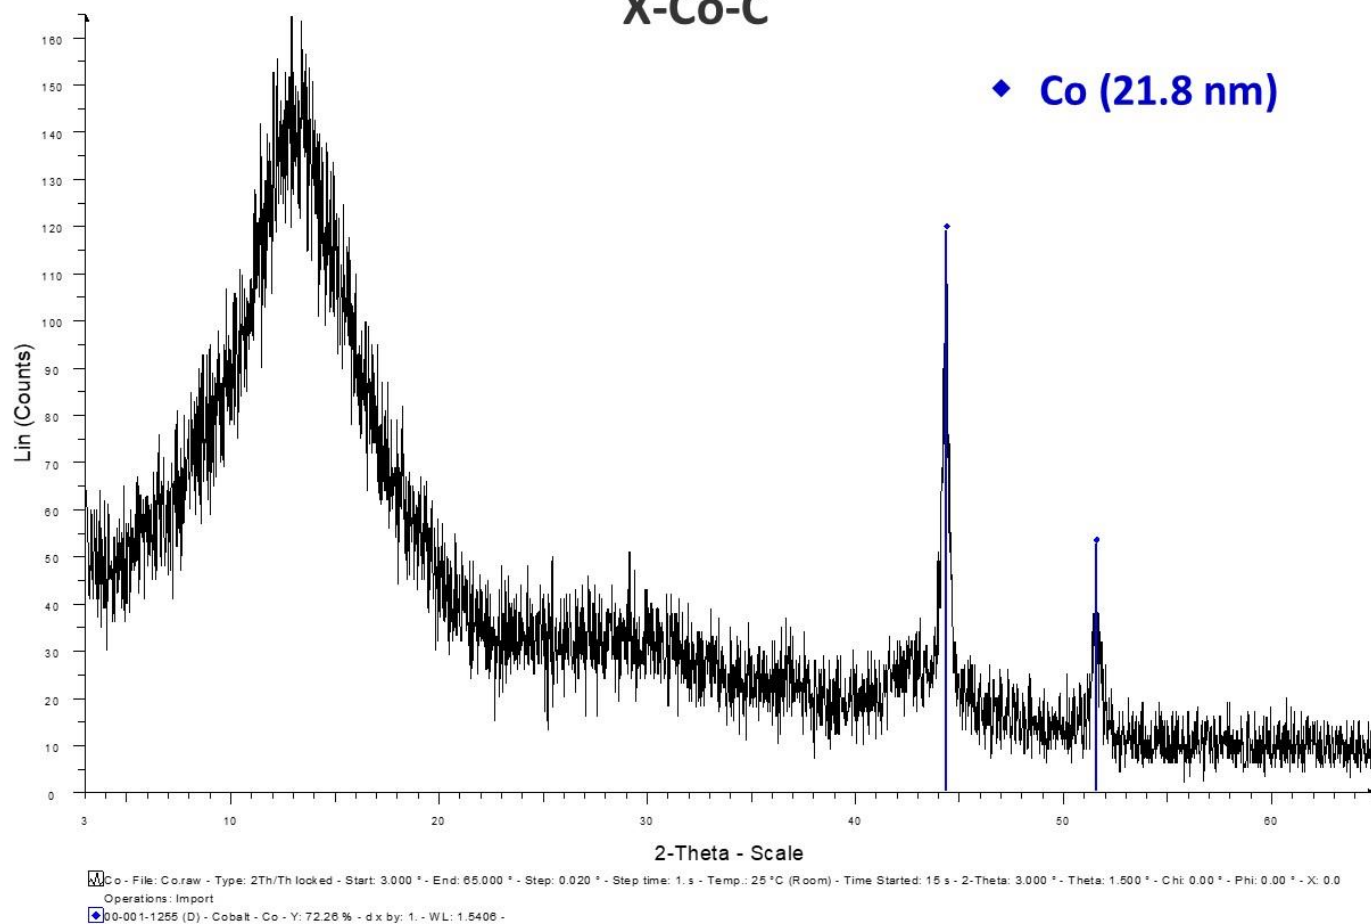

**Figure S7.** PXRD patterns of X-Co-C aerogel beads. Simulated experimental spectrum and library line spectra. The crystallite size is shown in parentheses.



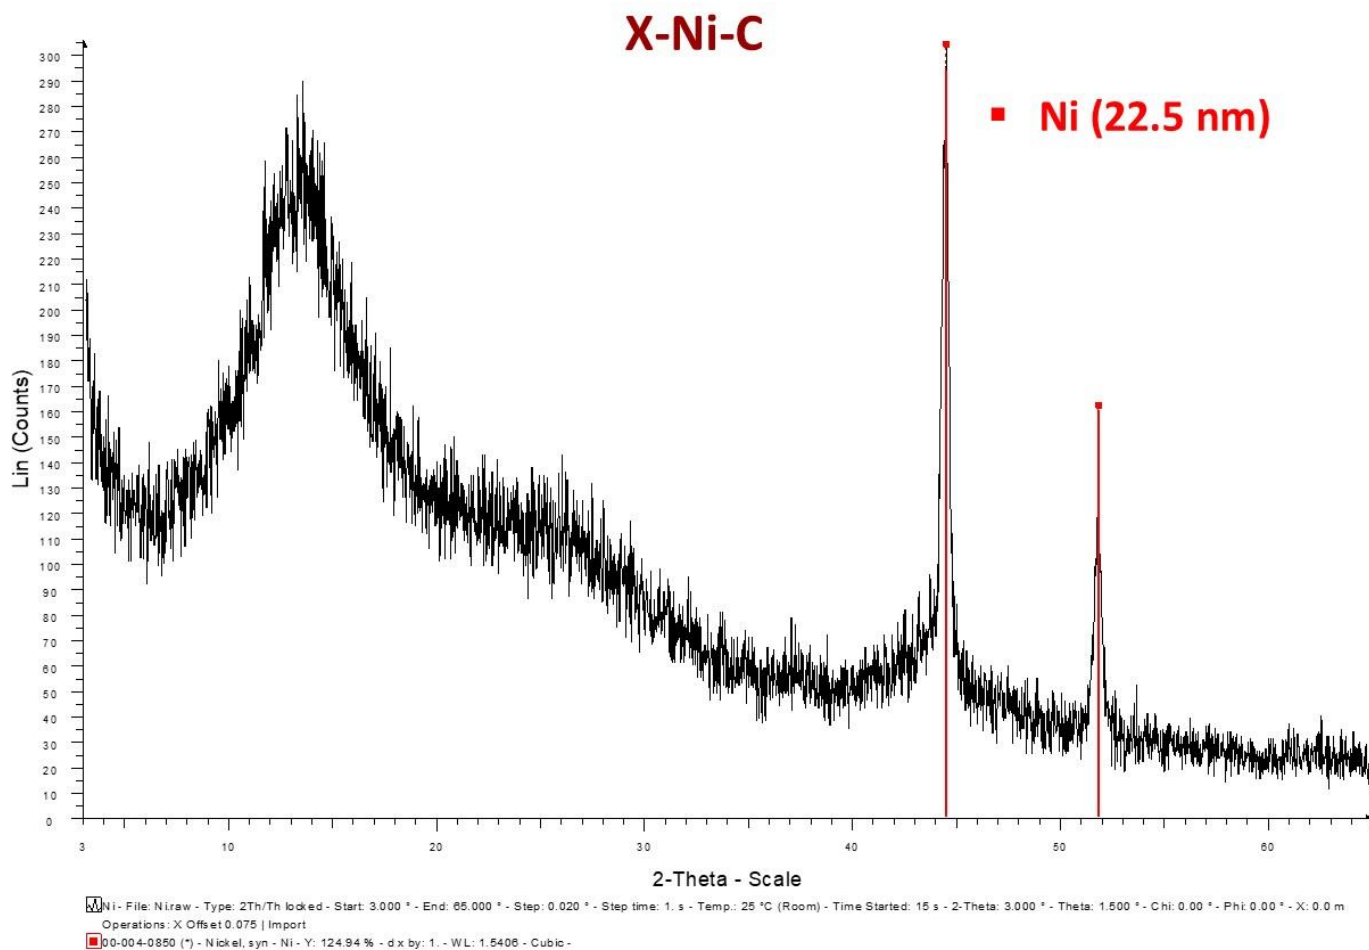

**Figure S8.** PXRD patterns of X-Ni-C aerogel beads. Simulated experimental spectrum and library line spectra. The crystallite size is shown in parentheses.



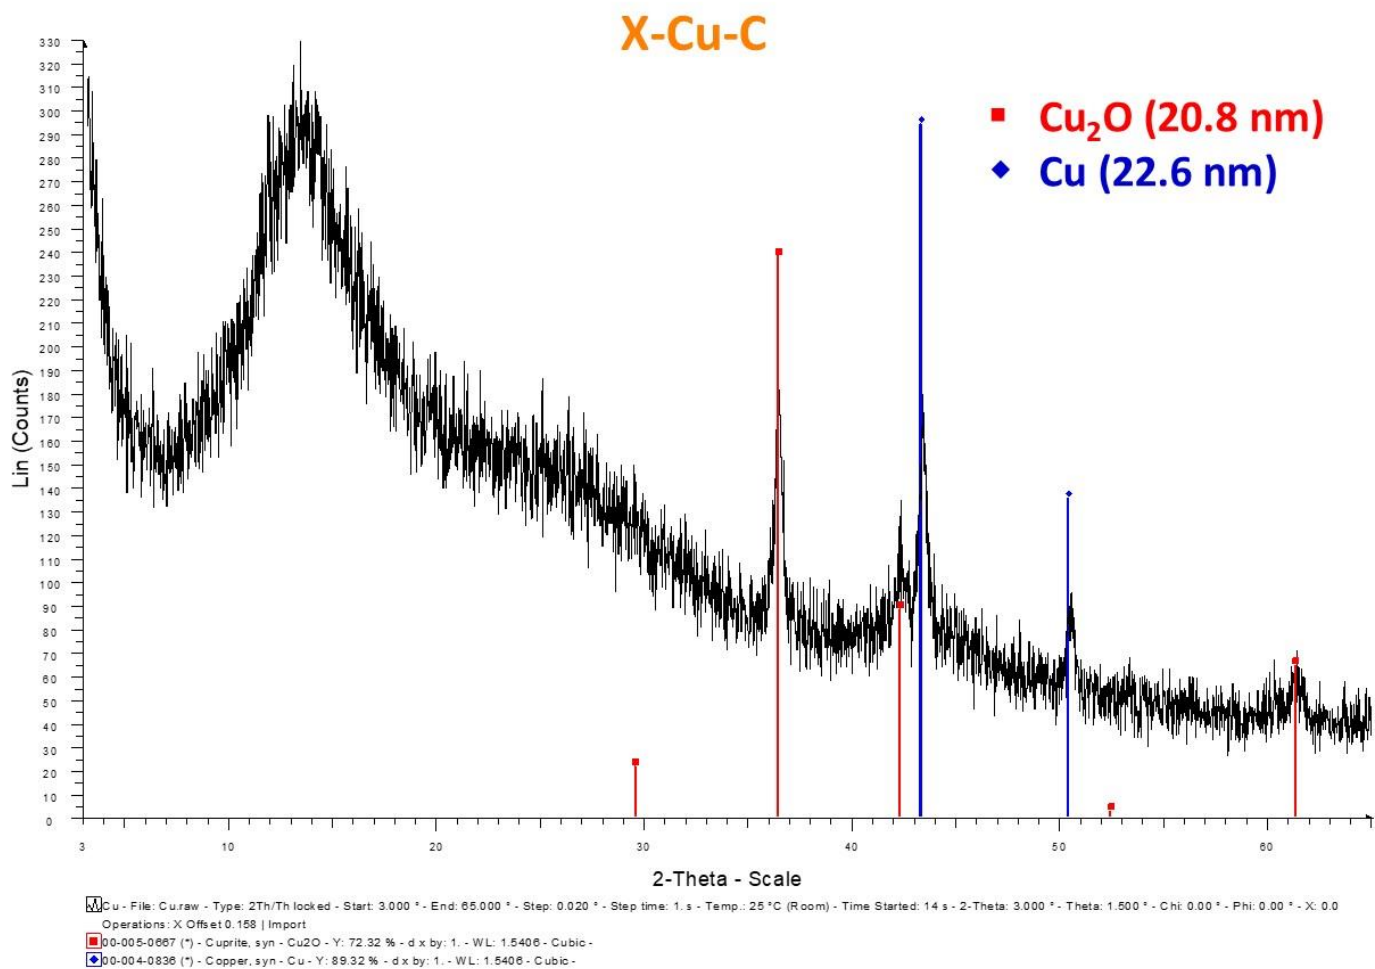

**Figure S9.** PXRD patterns of X-Cu-C aerogel beads. Simulated experimental spectrum and library line spectra. The crystallite size is shown in parentheses.

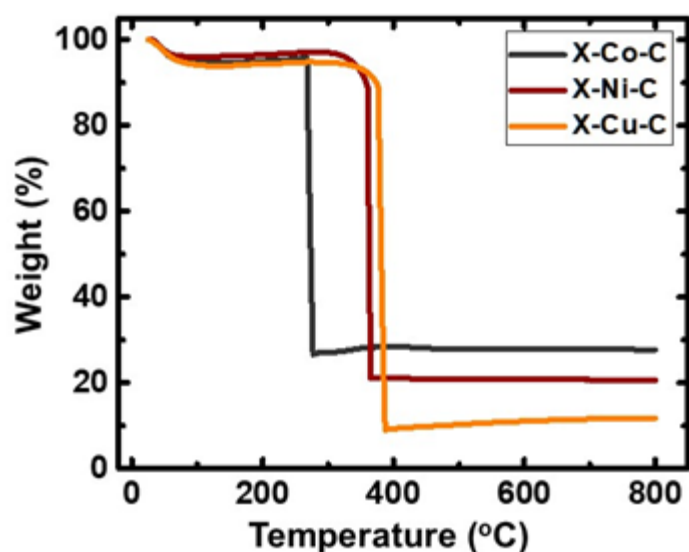

**Figure S10.** Thermogravimetric analysis (TGA, under O<sub>2</sub>) of carbon (X-M-C; M: Co, Ni, Cu) aerogel beads, as indicated.

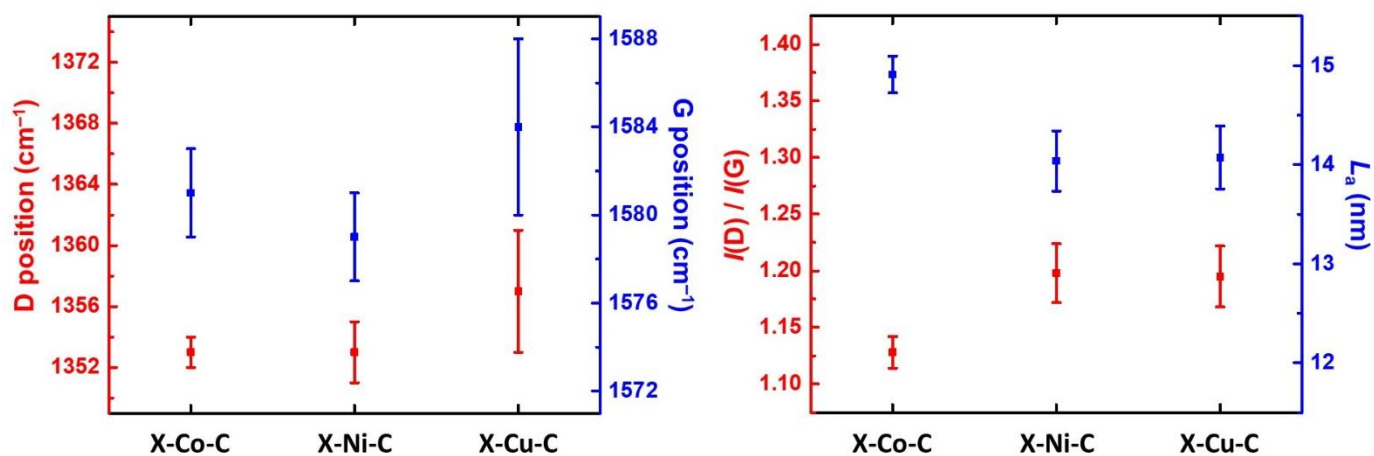

**Figure S11.** Left: Position of D and G bands on the Raman spectra of carbon (X-M-C; M: Co, Ni, Cu) aerogel beads. Right:  $I(D)/I(G)$  peak intensity ratio and calculated crystallite size ( $L_a$ ) of the graphitic domains. Error bars stand for standard deviation (N=10).

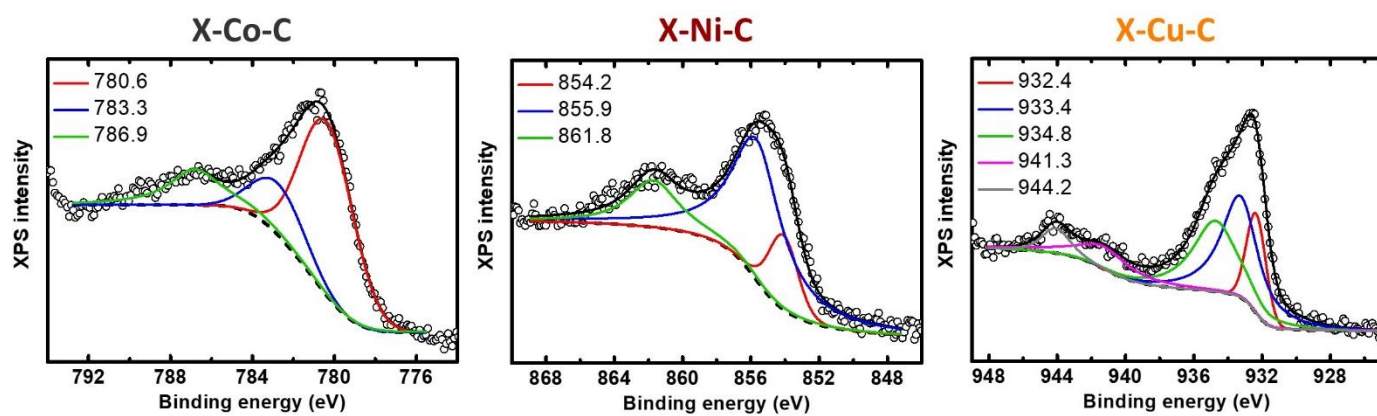

**Figure S12.** Deconvoluted Co  $2p_{3/2}$  (left), Ni  $2p_{3/2}$  (middle) and Cu  $2p_{3/2}$  (right) XP spectra of carbon (X-M-C; M: Co, Ni, Cu) aerogel beads, as indicated. Experimental points are shown with black circles, cumulative fit plots with black solid lines and Shirley baseline with dashed black lines. Peak maxima (eV) are provided within the frames.

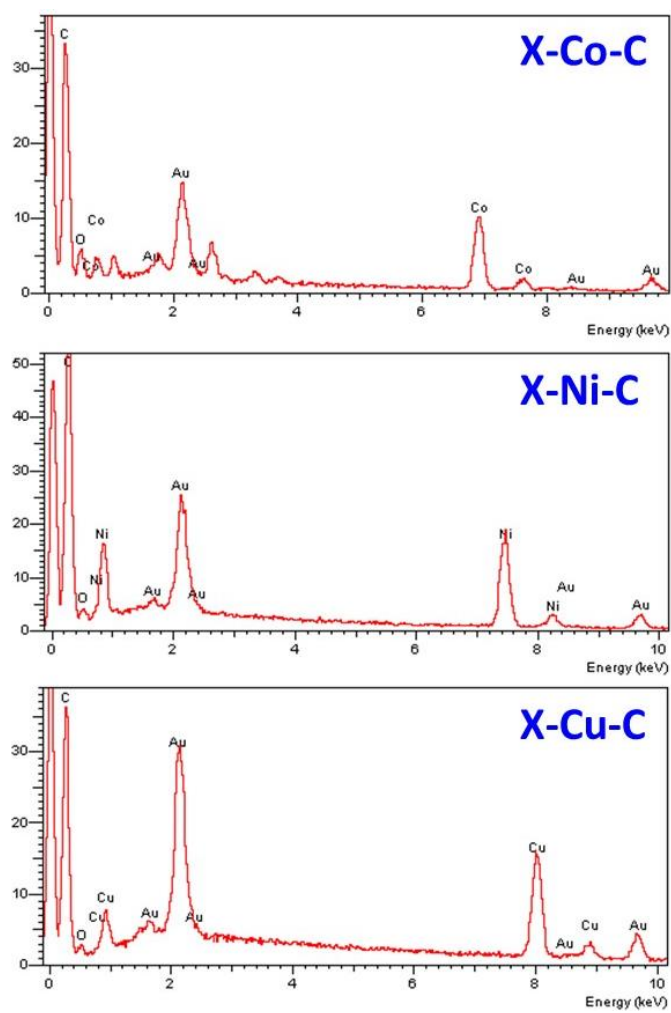

**Figure S13.** EDX spectra of carbon (X-M-C; M: Co, Ni, Cu) aerogel beads, as indicated.

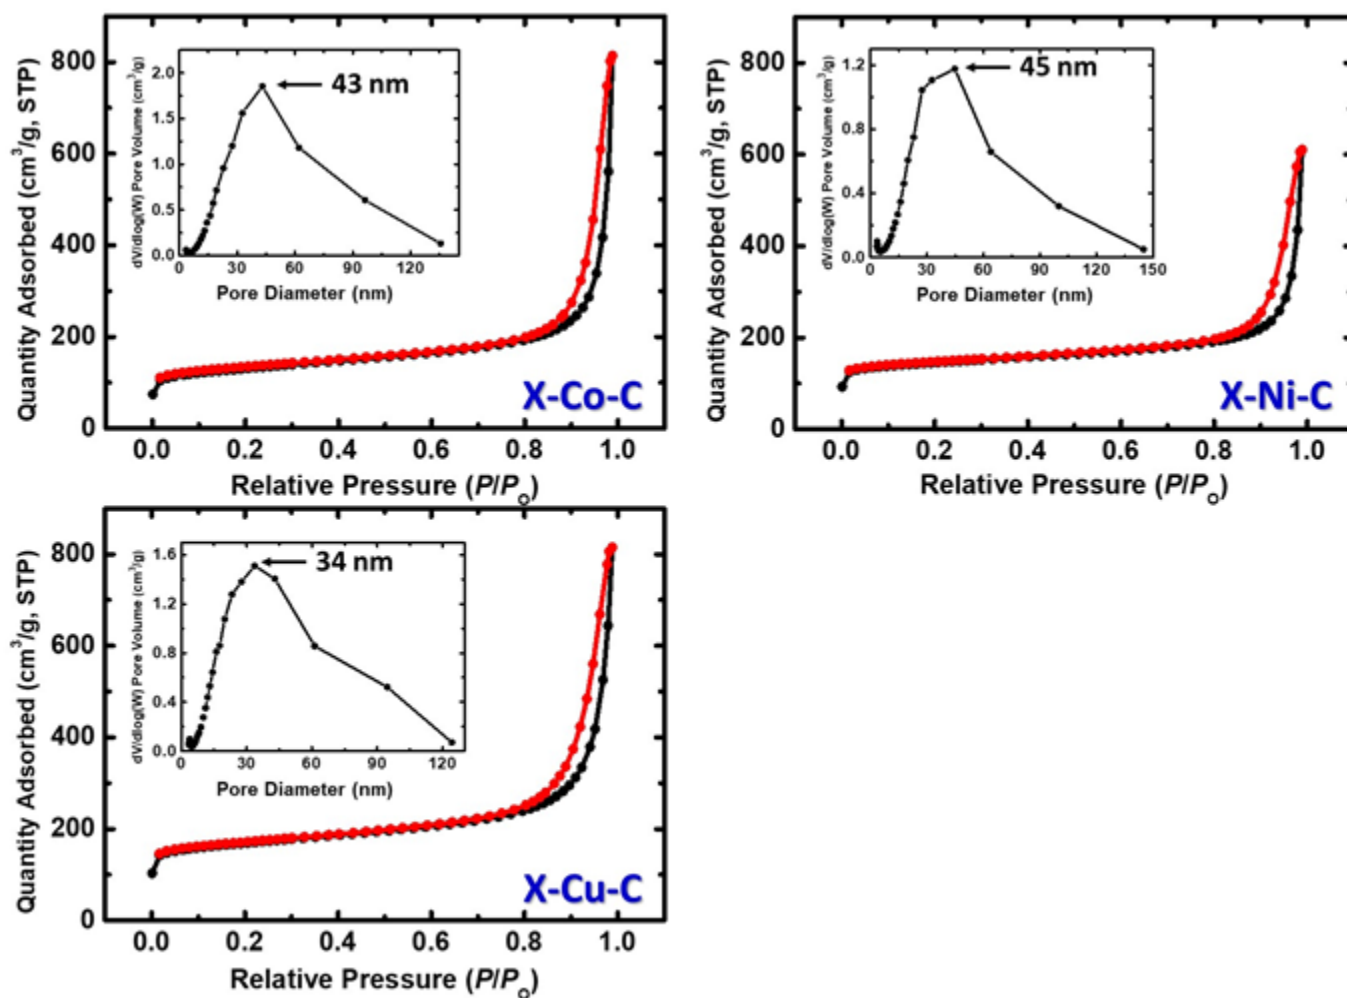

**Figure S14.** N<sub>2</sub>-sorption diagrams of carbon (X-M-C; M: Co, Ni, Cu) aerogel beads, as indicated. Insets show pore size distributions by the BJH method.

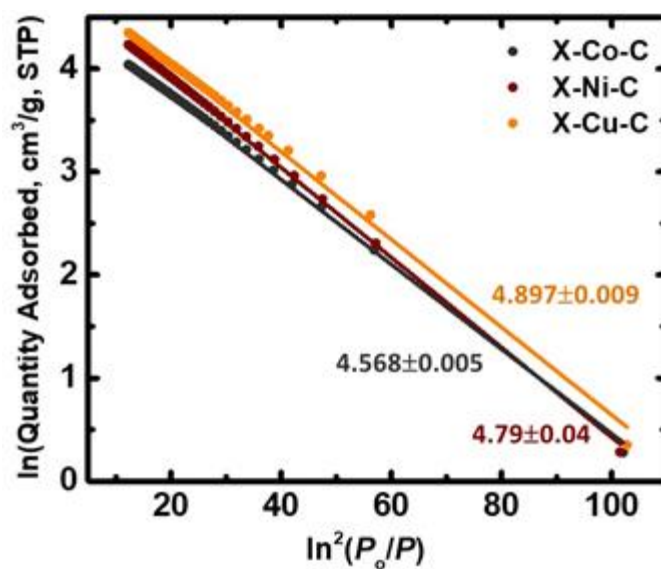

**Figure S15.** Dubinin-Radushkevich (DR) plots for carbon (X-M-C; M: Co, Ni, Cu) aerogel beads, as indicated. Specific micropore volumes were calculated from the intercepts (shown on the Figure, next to the corresponding line) of the linear-fitting plots.

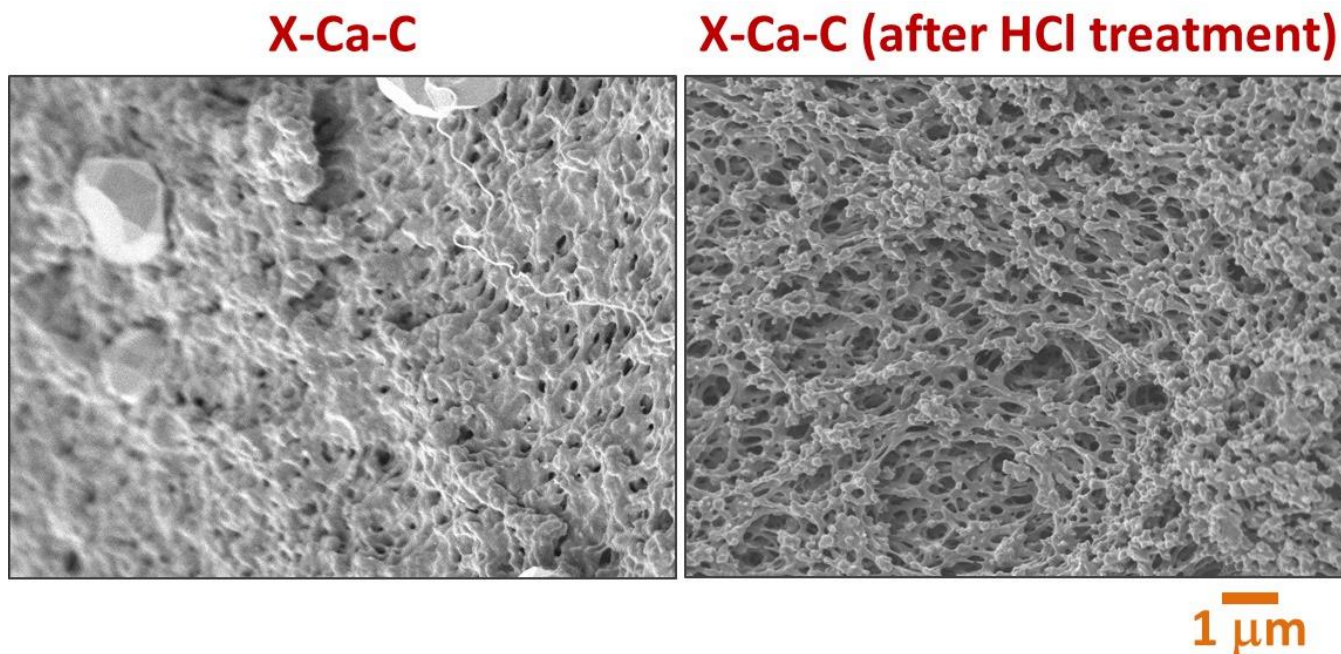

**Figure S16.** Representative SEM images of X-Ca-C beads as obtained (left) and after treatment with an aqueous HCl solution (right).
